# Supplementary material for: Enhanced piezocapacitive response in zinc oxide tetrapod–poly(dimethylsiloxane) composite dielectric layer for flexible and ultrasensitive pressure sensor
Source: Royal Society of Chemistry journal article supplement (doi:10.1039/d0nr06743a), 2021-01-01
Supplement: d0nr06743a1.pdf [file d0nr06743a1.pdf]

*Supporting information for*

**Enhanced Piezocapacitive Response in Zinc Oxide Tetrapod-Poly(dimethylsiloxane)  
Composite Dielectric Layer for Flexible and Ultrasensitive Pressure Sensor**

Gen-Wen Hsieh<sup>1\*</sup>, Shih-Rong Ling<sup>1</sup>, Fan-Ting Hung<sup>2</sup>, Pei-Hsiu Kao<sup>2</sup>, Jian-Bin Liu<sup>1</sup>

<sup>1</sup>Institute of Lighting and Energy Photonics, College of Photonics, National Chiao Tung University,  
No. 301, Gaofa 3rd Rd., Guiren District, Tainan 71150, Taiwan (R.O.C.)

<sup>2</sup>Institute of Photonic Technology, College of Photonics, National Chiao Tung University, No. 301,  
Gaofa 3rd Rd., Guiren District, Tainan 71150, Taiwan (R.O.C.)

\*Email: cwh31@nctu.edu.tw (G.-W.H.)

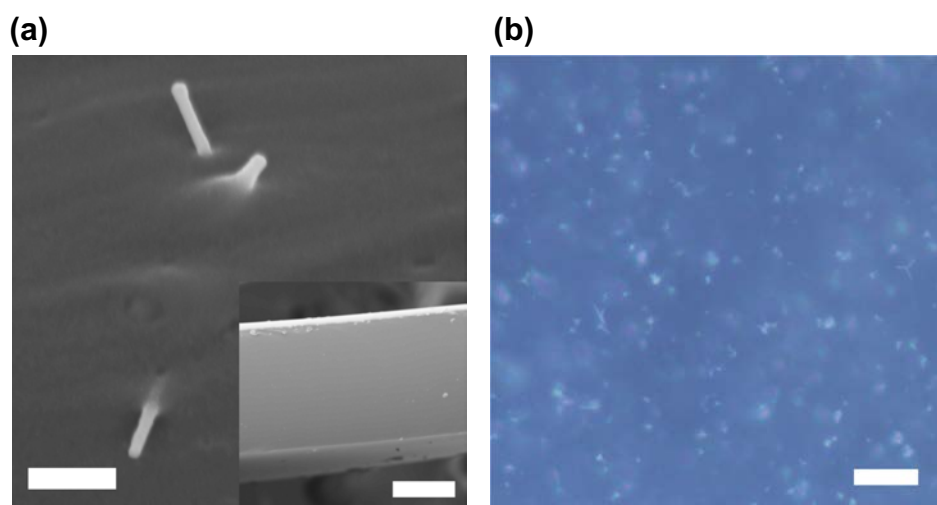

**Figure S1.** (a) Cross-sectional SEM images of a portion of the composite PDMS film with random distributed ZnO tetrapods (scale bar: 500 nm; inset: 100  $\mu\text{m}$ ). (b) Dark-field optical image of the composite film, showing randomly distributed tetrapod in the PDMS host (scale bar: 10  $\mu\text{m}$ ).

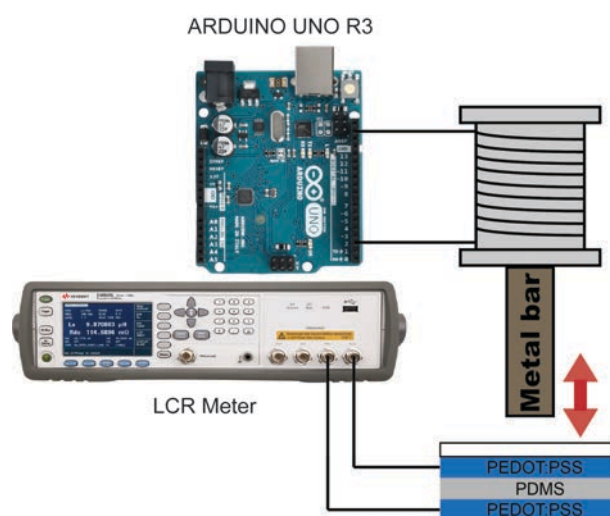

**Figure S2.** Schematic of a home-made characterization setup for automated mechanical application of repeated vertical force on the piezocapacitive pressure sensors. The placement and removal of pressure loads are applied by an electromagnet-controlled cylindrical metal bar (weight: 3 g). A programmed Arduino (UNO R3) platform drives the electromagnet at a frequency of 0.5 Hz. In ‘Loading’ state, the metal bar provides a pressure load of  $\sim 300$  Pa on the sensor; in contrast, in ‘Unloading’ state, the metal bar is magnetically lifted by the electromagnet (moving upward for  $\sim 5$  mm). The corresponding capacitances of the test sensor are recorded using the Agilent E4980A Precision LCR meter.

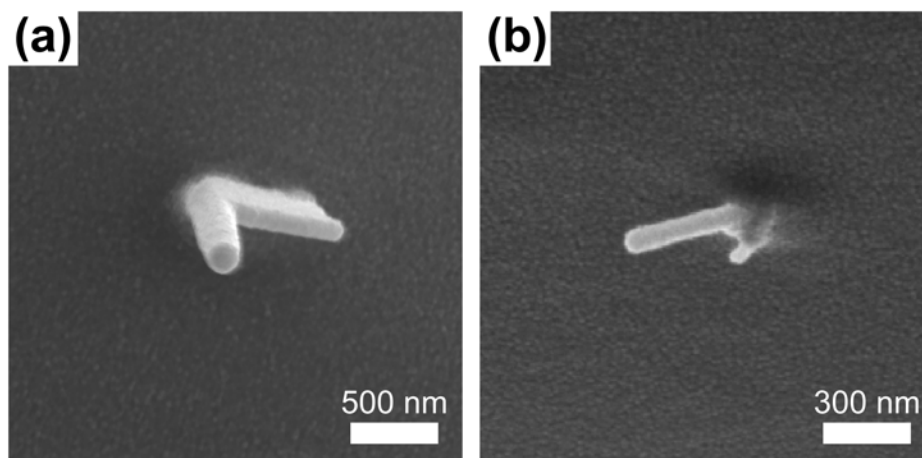

**Figure S3.** Cross-sectional SEM images of the ZnO tetrapod-PDMS composite (a) before and (b) after 1000 cyclic pressure loading. Both of them exhibit good interfacial compatibility between ZnO and PDMS.

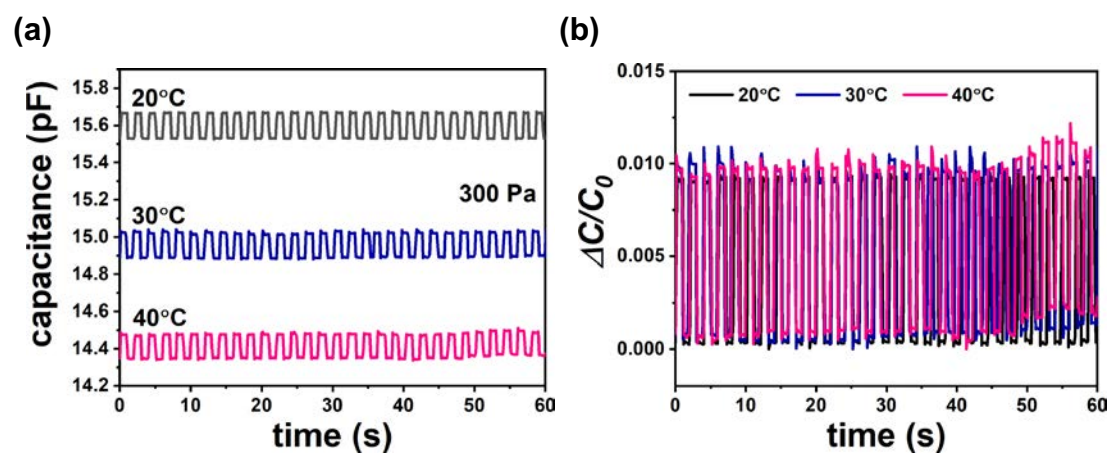

**Figure S4.** (a) Measured capacitance and (b) relative capacitance change for a ZnO tetrapod-PDMS capacitor operating at 20°C, 30°C, and 40°C, respectively (characterized by repeatedly loading-unloading a pressure of 300 Pa).

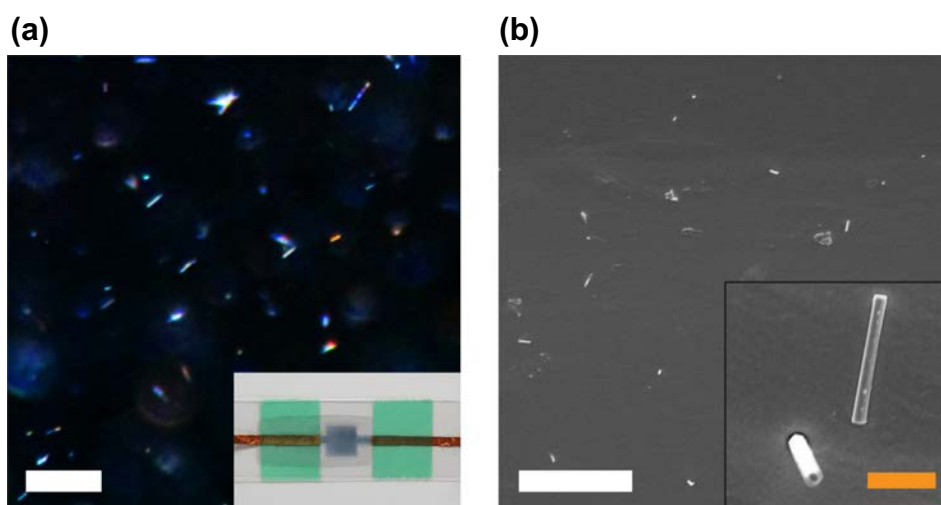

**Figure S5.** (a) Dark field optical image and photo image of a ZnO nanowire (1.0 wt% loading)-PDMS capacitor containing randomly distributed nanowires (scale bar: 10  $\mu\text{m}$ ). Note that much obvious nanowires can be observed from optical microscope directly. (b) Cross-sectional SEM images of a portion of the ZnO nanowire-PDMS composite film with random distributed ZnO nanowires (scale bar: 5  $\mu\text{m}$ ; inset: 1  $\mu\text{m}$ ).

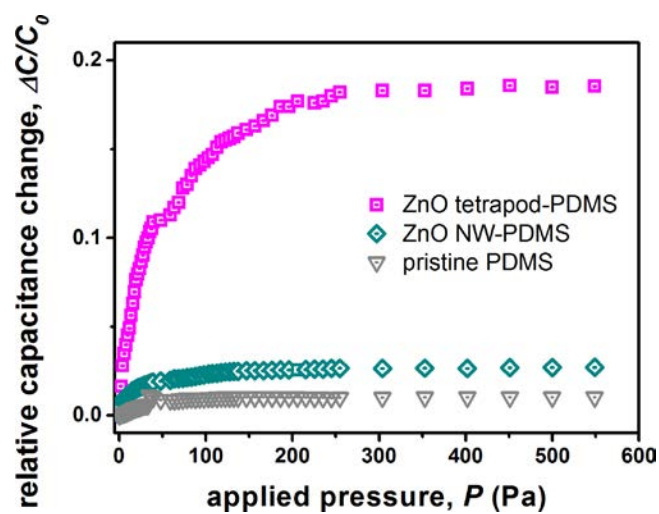

**Figure S6.** Plots of relative change in capacitance ( $\Delta C/C_0$ ) versus applied pressure ( $P$ ) using different piezocapacitive devices: ZnO tetrapod-PDMS, ZnO nanowire-PDMS, and pristine PDMS (sensing area: 10 mm  $\times$  10 mm).

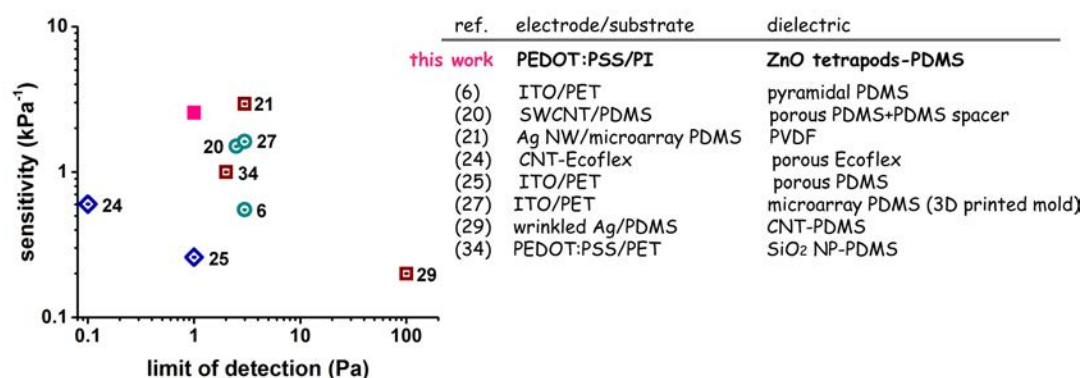

**Figure S7.** Comparison of the ZnO tetrapod-PDMS capacitive pressure sensor with other representative capacitive sensors in terms of both sensitivity and limit of detection.<sup>6,20,21,24,25,27,29,34</sup>

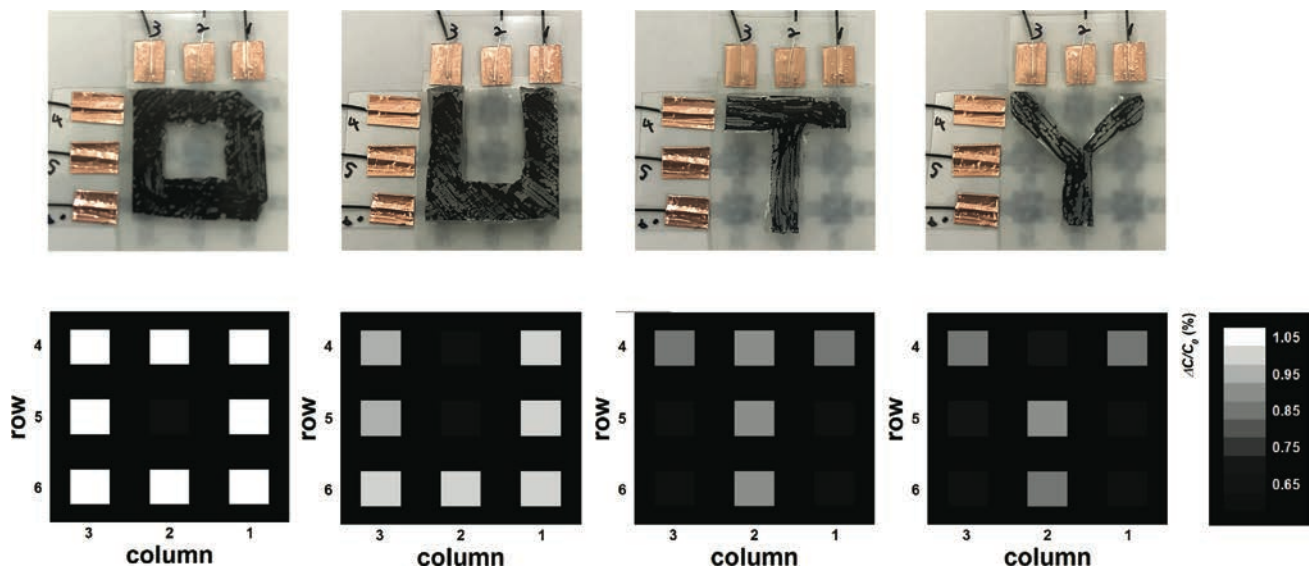

**Figure S8.** Spatial pressure distribution test of a  $3 \times 3$  array of the proposed composite capacitive pressure sensor with 1.0 wt% loading of ZnO tetrapods. Four different rubber objects with D (1.25 g), U (1.10 g), T (0.83 g), and Y (0.50 g) shapes, were placed on the sensor array, respectively. The gray level in the bar scale represents the magnitude of the relative capacitance change of each pixel (each sensing area:  $5 \text{ mm} \times 5 \text{ mm}$ ; pixel interval: 5 mm).
